# Supplementary material for: First-principles study on structural, electronic and optical properties of perovskite solid solutions KB1−xMgxI3 (B = Ge, Sn) toward water splitting photocatalysis
Source: Royal Society of Chemistry journal article supplement (doi:10.1039/d1ra04534b), 2021-01-01
Supplement: d1ra04534b1.pdf [file d1ra04534b1.pdf]

# Supplemental Material – First-principles study on structural, electronic and optical properties of perovskite solid solutions $\text{KB}_{1-x}\text{Mg}_x\text{I}_3$ (B = Ge, Sn) toward water splitting photocatalysis

Chol-Hyok Ri<sup>a</sup>, Yun-Sim Kim<sup>a</sup>, Un-Gi Jong<sup>a</sup>, Yon-Hyok Kye<sup>a</sup>, Se-Hun Ryang<sup>b</sup> and Chol-Jun Yu<sup>a\*</sup>

<sup>a</sup> Chair of Computational Materials Design, Faculty of Materials Science, Kim Il Sung University, Ryongnam-Dong, Taesong District, Pyongyang, PO Box 76, Democratic People's Republic of Korea

<sup>b</sup> Chair of Theoretical Physics, Faculty of Physics, Kim Hyong Jik University of Education, Ryul-Dong, Dongdaewon District, Pyongyang, Democratic People's Republic of Korea

## Computational details for mechanical property

We determined the bulk and shear moduli using the stiffness constants within the Voigt approximation as follows,

$$B_V = \frac{2C_{11} + C_{33} + 2(C_{12} + 2C_{13})}{9},$$
$$G_V = \frac{2C_{11} + C_{33} - (C_{12} + 2C_{13}) + 3(2C_{44} + C_{66})}{15} \quad (1)$$

Within Reuss approximation, we could also be calculated using the compliance constants as follows,

$$B_R = \frac{1}{2S_{11} + S_{33} + 2(S_{12} + 2S_{13})},$$
$$G_R = \frac{15}{4(2S_{11} + S_{33}) - 4(S_{12} + 2S_{13}) + 3(2S_{44} + S_{66})} \quad (2)$$

Within Hill approximation, the real moduli are estimated by average values as follows,

$$B = \frac{B_V + B_R}{2}, G = \frac{G_V + G_R}{2} \quad (3)$$

Then, the Young's modulus and Poisson's ratio ( $\nu$ ) are estimated from the calculated bulk and shear moduli as follows,

$$E = \frac{9BG}{3B + G}, \nu = \frac{3B - 2G}{6B + 2G} \quad (4)$$

We determined the longitudinal ( $v_l$ ) and transverse ( $v_t$ ) elastic wave velocities with elastic moduli as follows,

$$v_l = \sqrt{\frac{3B + 4G}{3\rho}}, v_t = \sqrt{\frac{G}{\rho}} \quad (5)$$

where  $\rho$  is the density. With these values, we evaluated the average sound velocity  $v_m$  as follows,

$$v_m = \left[ \frac{1}{3} \left( \frac{2}{v_t^3} + \frac{1}{v_l^3} \right) \right]^{-1/3} \quad (6)$$

With the following relation, we estimated the Debye temperature  $\theta_D$ , which is an very important parameter for checking the degree of mechanical properties,

$$\theta_D = \frac{h}{k_B} \left[ \frac{3N}{4\pi V} \right]^{1/3} v_m \quad (7)$$

where  $h$  and  $k_B$  are the Plank's and Boltzmann's constants,  $N$  the number of atoms in the unit cell and  $V$  the unit cell volume.

\*Corresponding author: Chol-Jun Yu, Email: cj.yu@ryongnamsan.edu.kp

Table S1. Lattice constants ( $a, b, c$ ) and lattice angle ( $\alpha$ ) of CsGeI<sub>3</sub> and CsSnI<sub>3</sub>, calculated with PBE functional.

| Compound           | Space group | Lattice constants(Å)      |                   |                                | Lattice angle (deg) |                    |                    |
|--------------------|-------------|---------------------------|-------------------|--------------------------------|---------------------|--------------------|--------------------|
|                    |             | Our cal.                  | Other cal.        | Exp.                           | Our cal.            | Other cal.         | Exp.               |
| CsGeI <sub>3</sub> | <i>R3m</i>  | $a = b = c = 5.93$        | 6.13 <sup>a</sup> | 5.98 <sup>b</sup>              | 88.67               | 88.28 <sup>a</sup> | 88.60 <sup>b</sup> |
| CsSnI <sub>3</sub> | <i>Pnma</i> | $a=8.60, b=8.62, c=12.41$ | –                 | 8.69, 8.64, 12.38 <sup>c</sup> | –                   | –                  | –                  |

<sup>a</sup>Calculated with the PBE functional [1]

<sup>b</sup>Ref. [2]

<sup>c</sup>Ref. [3]

Table S2. Band gaps (unit: eV) in CsGeI<sub>3</sub>, CsSnI<sub>3</sub>, CsMgI<sub>3</sub> calculated with PBE and HSE06 functionals with and without SOC effect. Cal. and Exp. stand for calculation and experiment.

| Compound           | Our cal. |         |       |           | Other cal.                       | Exp.              |
|--------------------|----------|---------|-------|-----------|----------------------------------|-------------------|
|                    | PBE      | PBE+SOC | HSE06 | HSE06+SOC |                                  |                   |
| CsMgI <sub>3</sub> | 1.40     | 1.31    | 2.08  | 1.44      | 1.7 (LDA), 3.4 (GW) <sup>a</sup> |                   |
| CsGeI <sub>3</sub> | 0.89     | 0.82    | 1.64  | 1.54      | 1.41 <sup>b</sup>                | 1.63 <sup>d</sup> |
| CsSnI <sub>3</sub> | 0.80     | 0.71    | 1.28  | 1.12      | 0.50 <sup>c</sup>                | 1.30 <sup>e</sup> |

<sup>a</sup>Ref. [4]

<sup>b</sup>HSE06+SOC [1]

<sup>c</sup>LDA [6]

<sup>d</sup>Ref. [5]

<sup>e</sup>Ref. [7]

Table S3. Elastic stiffness constants ( $C_{ij}$ ), bulk modulus ( $B$ ), shear modulus ( $G$ ), Young's modulus ( $E$ ), Pugh's ratio ( $B/G$ ), and Poisson's ratio ( $\nu$ ) of the systems, calculated with PBE functional.

| System                                            | $x$       | Elastic stiffness constant (GPa) |          |          |          |          |          | Elastic modulus (GPa) |       |       |       |       |
|---------------------------------------------------|-----------|----------------------------------|----------|----------|----------|----------|----------|-----------------------|-------|-------|-------|-------|
|                                                   |           | $C_{11}$                         | $C_{12}$ | $C_{13}$ | $C_{33}$ | $C_{44}$ | $C_{66}$ | $B$                   | $G$   | $E$   | $B/G$ | $\nu$ |
| KGe <sub>1-x</sub> Mg <sub>x</sub> I <sub>3</sub> | 0.00      | 262.2                            | 162.5    | 97.1     | 431.9    | 150.8    | 73.0     | 184.2                 | 103.9 | 262.4 | 1.772 | 0.263 |
|                                                   | 0.25      | 266.1                            | 157.8    | 111.6    | 400.0    | 133.4    | 76.7     | 187.1                 | 98.5  | 251.4 | 1.900 | 0.276 |
|                                                   | 0.50 (I)  | 263.9                            | 153.2    | 122.5    | 380.9    | 126.8    | 82.8     | 188.3                 | 96.3  | 246.9 | 1.954 | 0.281 |
|                                                   | 0.50 (II) | 274.6                            | 155.0    | 127.4    | 352.3    | 117.3    | 83.0     | 190.8                 | 91.9  | 237.6 | 2.075 | 0.292 |
|                                                   | 0.75      | 278.9                            | 150.0    | 132.3    | 348.0    | 111.0    | 89.3     | 192.3                 | 92.7  | 239.7 | 2.073 | 0.292 |
|                                                   | 1.00      | 279.5                            | 142.5    | 141.3    | 345.9    | 102.6    | 99.2     | 194.1                 | 91.7  | 237.7 | 2.117 | 0.296 |
| KSn <sub>1-x</sub> Mg <sub>x</sub> I <sub>3</sub> | 0.00      | 207.2                            | 163.8    | 72.1     | 423.3    | 108.8    | 47.3     | 159.7                 | 71.3  | 186.1 | 2.241 | 0.306 |
|                                                   | 0.25      | 221.4                            | 161.7    | 90.2     | 397.6    | 104.8    | 54.8     | 167.9                 | 74.2  | 193.9 | 2.264 | 0.308 |
|                                                   | 0.50 (I)  | 223.2                            | 158.9    | 105.5    | 391.9    | 103.5    | 60.6     | 173.4                 | 73.5  | 193.1 | 2.360 | 0.314 |
|                                                   | 0.50 (II) | 241.1                            | 153.9    | 114.7    | 353.4    | 109.3    | 66.5     | 177.1                 | 78.1  | 204.4 | 2.266 | 0.308 |
|                                                   | 0.75      | 258.8                            | 152.3    | 122.1    | 346.6    | 103.1    | 73.1     | 183.5                 | 78.9  | 207.1 | 2.325 | 0.312 |
|                                                   | 1.00      | 279.5                            | 142.5    | 141.3    | 345.9    | 102.6    | 99.2     | 194.1                 | 91.7  | 237.7 | 2.117 | 0.296 |

Table S4. Elastic compliance constants (unit: GPa<sup>-1</sup>).

| System                                            | $x$       | $S_{11}$ | $S_{12}$ | $S_{13}$ | $S_{33}$ | $S_{44}$ | $S_{66}$ |
|---------------------------------------------------|-----------|----------|----------|----------|----------|----------|----------|
| KGe <sub>1-x</sub> Mg <sub>x</sub> I <sub>3</sub> | 0.00      | 0.006    | -0.004   | -0.001   | 0.003    | 0.007    | 0.014    |
|                                                   | 0.25      | 0.006    | -0.003   | -0.001   | 0.003    | 0.008    | 0.013    |
|                                                   | 0.50 (I)  | 0.006    | -0.003   | -0.001   | 0.003    | 0.008    | 0.012    |
|                                                   | 0.50 (II) | 0.006    | -0.003   | -0.001   | 0.004    | 0.009    | 0.012    |
|                                                   | 0.75      | 0.005    | -0.002   | -0.001   | 0.004    | 0.009    | 0.011    |
|                                                   | 1.00      | 0.005    | -0.002   | -0.001   | 0.004    | 0.010    | 0.010    |
| KSn <sub>1-x</sub> Mg <sub>x</sub> I <sub>3</sub> | 0.00      | 0.013    | -0.010   | 0.000    | 0.003    | 0.009    | 0.021    |
|                                                   | 0.25      | 0.010    | -0.007   | -0.001   | 0.003    | 0.010    | 0.018    |
|                                                   | 0.50 (I)  | 0.009    | -0.006   | -0.001   | 0.003    | 0.010    | 0.016    |
|                                                   | 0.50 (II) | 0.008    | -0.005   | -0.001   | 0.003    | 0.011    | 0.015    |
|                                                   | 0.75      | 0.006    | -0.003   | -0.001   | 0.004    | 0.010    | 0.019    |
|                                                   | 1.00      | 0.005    | -0.002   | -0.001   | 0.004    | 0.010    | 0.010    |

Table S5. Elastic moduli within Reuss ( $B_R$  and  $G_R$ ) and Voigt ( $B_V$  and  $G_V$ ) approximation (unit: GPa), and longitudinal ( $v_l$ ) and transverse ( $v_t$ ) elastic wave velocities, average sound velocity ( $v_m$ ) (unit: m/s) and Debye temperature  $\theta_D$  (unit: K).

| System                                            | $x$       | $B_R$  | $G_R$ | $B_V$  | $G_V$  | $v_l$  | $v_t$  | $v_m$  | $\theta_D$ |
|---------------------------------------------------|-----------|--------|-------|--------|--------|--------|--------|--------|------------|
| KGe <sub>1-x</sub> Mg <sub>x</sub> I <sub>3</sub> | 0.00      | 182.81 | 92.94 | 185.50 | 114.88 | 8969.4 | 5089.4 | 5658.9 | 489.5      |
|                                                   | 0.25      | 186.04 | 91.54 | 188.23 | 105.44 | 8967.9 | 4987.3 | 5554.2 | 482.4      |
|                                                   | 0.50 (I)  | 187.08 | 91.36 | 189.49 | 101.32 | 9004.4 | 4966.0 | 5534.0 | 482.5      |
|                                                   | 0.50 (II) | 190.34 | 87.60 | 191.23 | 96.28  | 8946.6 | 4846.0 | 5407.6 | 471.8      |
|                                                   | 0.75      | 191.78 | 90.46 | 192.77 | 95.01  | 9038.7 | 4897.1 | 5464.6 | 479.0      |
|                                                   | 1.00      | 193.28 | 90.55 | 195.00 | 92.84  | 9105.5 | 4901.8 | 5472.4 | 481.9      |
| KSn <sub>1-x</sub> Mg <sub>x</sub> I <sub>3</sub> | 0.00      | 157.83 | 54.22 | 161.53 | 88.30  | 8112.4 | 4291.1 | 4796.5 | 397.9      |
|                                                   | 0.25      | 166.42 | 62.19 | 169.40 | 86.11  | 8316.2 | 4384.4 | 4902.0 | 412.4      |
|                                                   | 0.50 (I)  | 171.38 | 65.22 | 175.34 | 81.73  | 8420.5 | 4381.8 | 4903.4 | 417.9      |
|                                                   | 0.50 (II) | 176.17 | 69.10 | 178.02 | 87.19  | 8541.9 | 4502.3 | 5033.8 | 430.0      |
|                                                   | 0.75      | 182.93 | 73.48 | 184.13 | 84.37  | 8684.2 | 4540.1 | 5079.0 | 440.1      |
|                                                   | 1.00      | 193.28 | 90.55 | 195.00 | 92.84  | 9105.5 | 4901.8 | 5472.4 | 481.9      |

Table S6. Band gaps (unit: eV) calculated with different levels of DFT method.

| Systeme                                           | $x$       | Our cal. |         |       |           | Other cal. <sup>a</sup> |
|---------------------------------------------------|-----------|----------|---------|-------|-----------|-------------------------|
|                                                   |           | PBE      | PBE+SOC | HSE06 | HSE06+SOC |                         |
| KGe <sub>1-x</sub> Mg <sub>x</sub> I <sub>3</sub> | 0.00      | 0.851    | 0.615   | 1.238 | 1.041     | 1.08                    |
|                                                   | 0.25      | 1.227    | 1.059   | 1.713 | 1.551     |                         |
|                                                   | 0.50 (I)  | 1.486    | 1.264   | 2.110 | 1.916     |                         |
|                                                   | 0.50 (II) | 2.057    | 1.955   | 2.679 | 2.648     |                         |
|                                                   | 0.75      | 2.232    | 2.153   | 3.044 | 2.994     |                         |
|                                                   | 1.00      | 1.981    | 1.892   | 2.920 | 2.801     |                         |
| KSn <sub>1-x</sub> Mg <sub>x</sub> I <sub>3</sub> | 0.00      | 0.658    | 0.593   | 1.070 | 1.021     | 0.97                    |
|                                                   | 0.25      | 1.075    | 0.944   | 1.541 | 1.393     |                         |
|                                                   | 0.50 (I)  | 1.066    | 1.047   | 1.659 | 1.640     |                         |
|                                                   | 0.50 (II) | 2.008    | 1.923   | 2.607 | 2.595     |                         |
|                                                   | 0.75      | 2.295    | 2.064   | 2.886 | 2.862     |                         |
|                                                   | 1.00      | 1.981    | 1.892   | 2.920 | 2.801     |                         |

<sup>a</sup>GLLB-SC calculation [8]

Table S7. Fitting parameters (unit: eV) of band gaps calculated with HSE06 to quadratic function of  $E_g(x) = E_g(0) + [E_g(1) - E_g(0) - b]x + bx^2$ .

| System                                            | $E_g(0)$ | $E_g(1)$ | $b$    |
|---------------------------------------------------|----------|----------|--------|
| KGe <sub>1-x</sub> Mg <sub>x</sub> I <sub>3</sub> |          |          |        |
| I                                                 | 1.172    | 3.050    | -0.755 |
| II                                                | 1.123    | 3.001    | -2.056 |
| KSn <sub>1-x</sub> Mg <sub>x</sub> I <sub>3</sub> |          |          |        |
| I                                                 | 1.040    | 3.058    | 0.269  |
| II                                                | 0.959    | 2.977    | -1.898 |

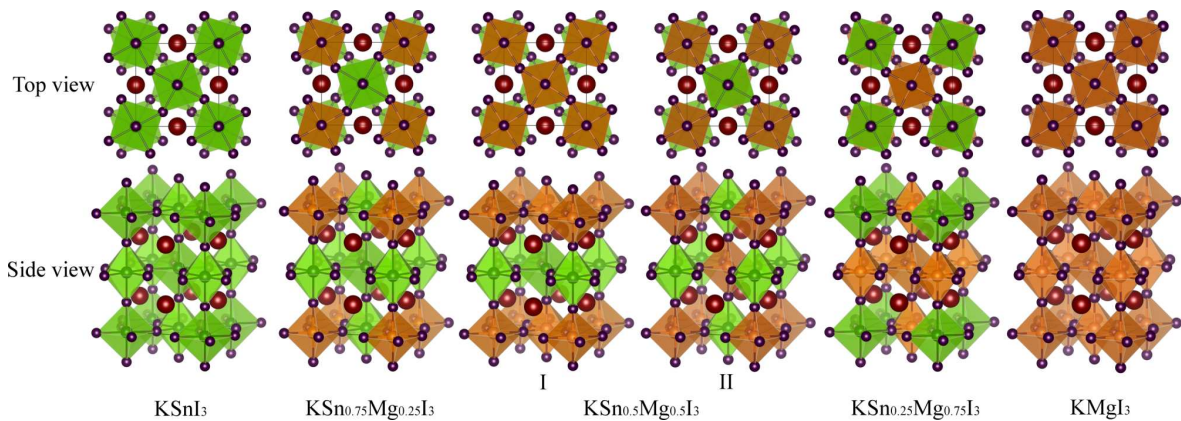

Figure S1. Crystalline structures of  $\text{KSn}_{1-x}\text{Mg}_x\text{I}_3$  with  $x = 0, 0.25, 0.5$  (I, II),  $0.75$ , and  $1$ , optimized with PBE functional.

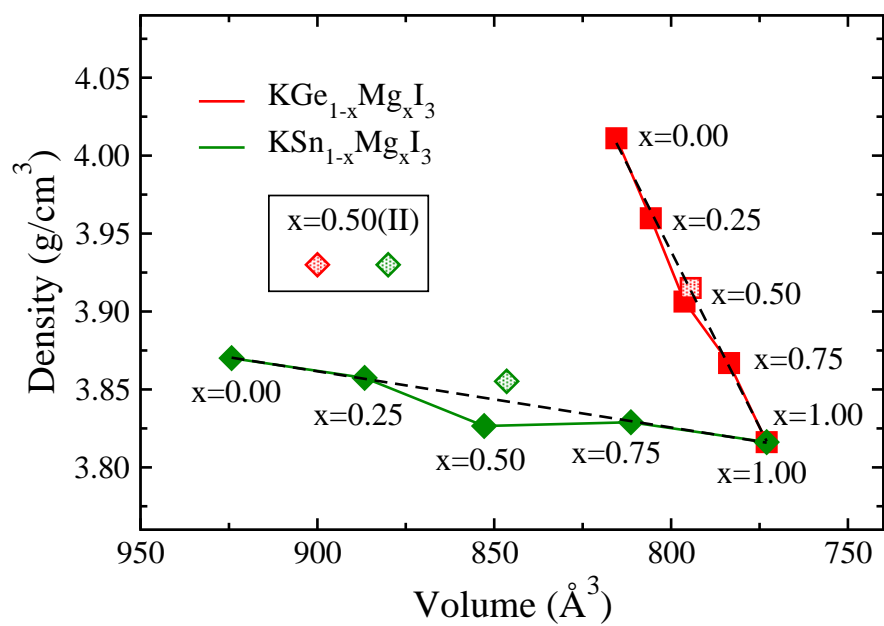

Figure S2. Linear relation of volume with density in  $\text{KB}_{1-x}\text{Mg}_x\text{I}_3$  ( $B = \text{Ge}, \text{Sn}$ ).

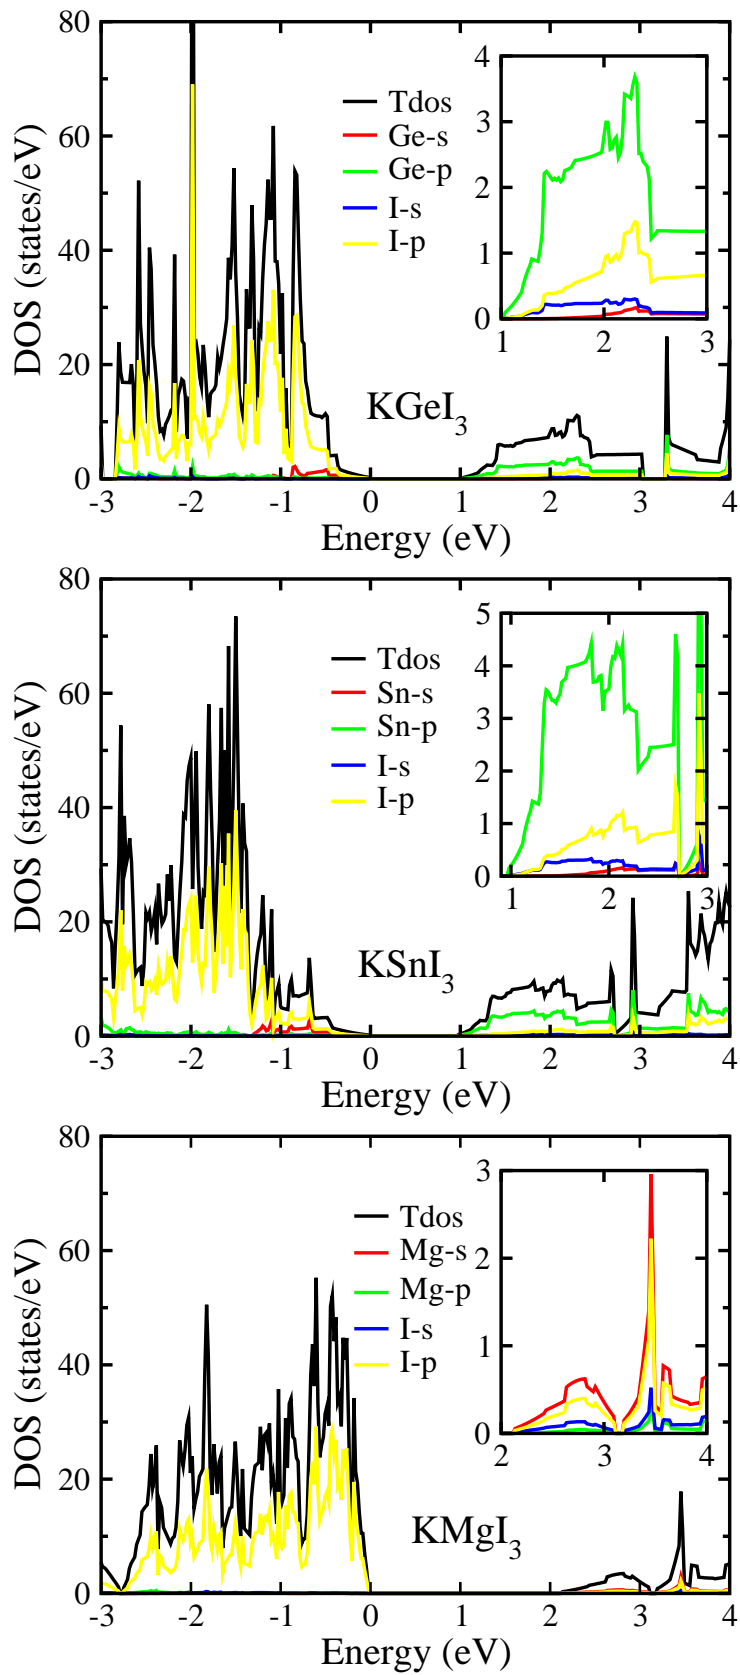

Figure S3. Partial density of states (DOS) of  $\text{KGeI}_3$ ,  $\text{KSnI}_3$  and  $\text{KMgI}_3$ .

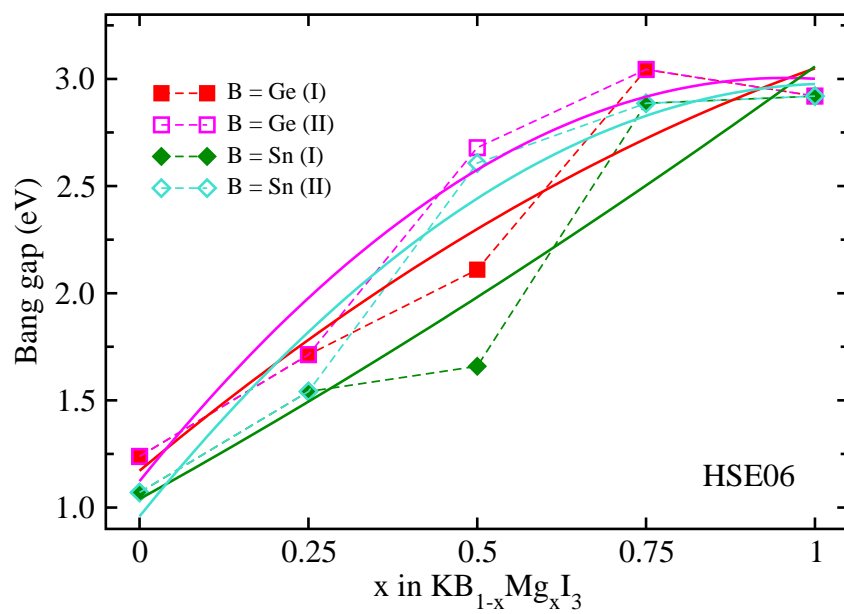

Figure S4. Fitting the band gaps calculated with HSE06 to the quadratic function for  $\text{KB}_{1-x}\text{Mg}_x\text{I}_3$  (B = Ge, Sn) with  $x = 0, 0.25, 0.5$  (I, II),  $0.75$ , and  $1$ . Dashed lines show the calculated values, and solid lines show the quadratic fitting functions.

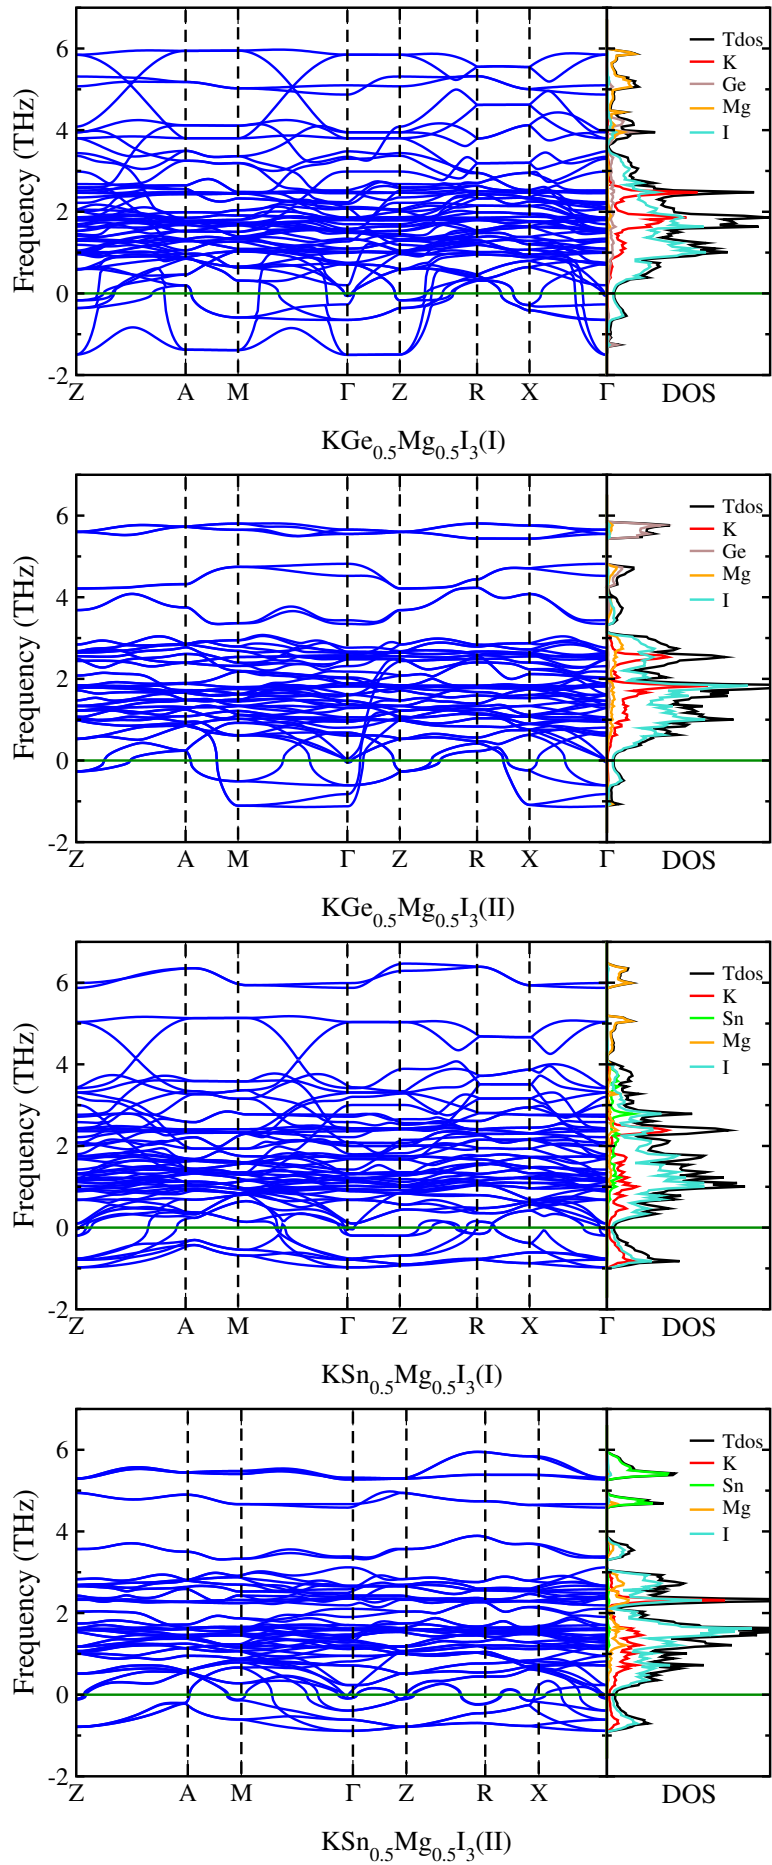

Figure S5. Phonon dispersion curves and the atom-resolved phonon DOS for (a)  $\text{KGe}_{0.5}\text{Mg}_{0.5}\text{I}_3$  (I), (b)  $\text{KGe}_{0.5}\text{Mg}_{0.5}\text{I}_3$  (II), (c)  $\text{KSn}_{0.5}\text{Mg}_{0.5}\text{I}_3$  (I), (d)  $\text{KSn}_{0.5}\text{Mg}_{0.5}\text{I}_3$  (II).

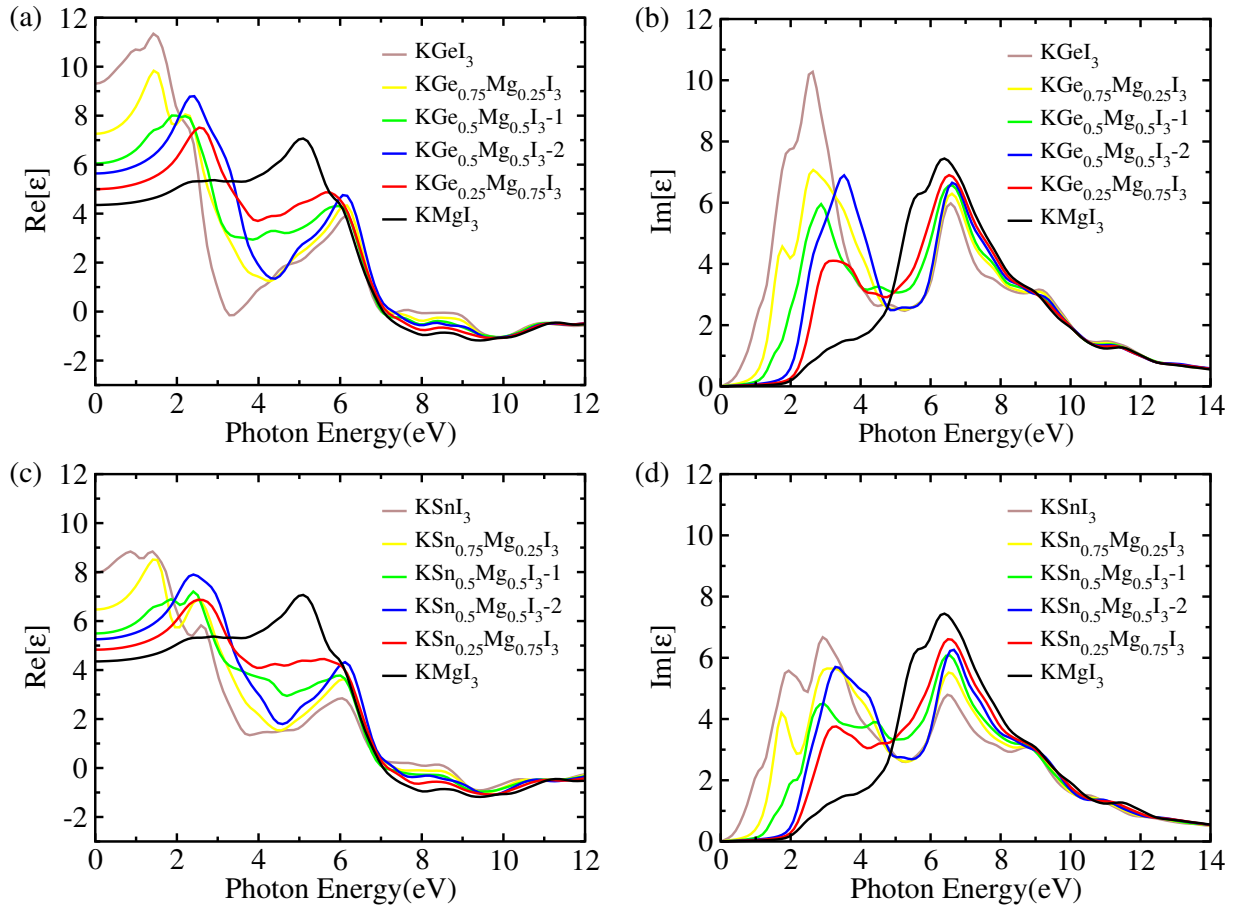

Figure S6. (a), (c) Real parts and (b), (d) imaginary parts of frequency-dependent dielectric constants of  $\text{KB}_x\text{Mg}_{1-x}\text{I}_3$  ( $B = \text{Ge}, \text{Sn}$ ) with  $x = 0, 0.25, 0.5$  (I, II),  $0.75$  and  $1$ , calculated with PBE functional.



---

## References

- [1] G. Walters, E. H. Sargent, *J. Phys. Chem. Lett.*, 2018, **9**, 1018–1027.
- [2] L. C. Tang, J. Y. Huang, C. S. Chang, M. H. Lee, L. Q. Liu, *J. Phys.: Condens. Matter*, 2005, **17**, 7275–7286.
- [3] I. Chung, J.-H. Song, J. Im, J. Androulakis, C. D. Malliakas, H. Li, A. J. Freeman, J. T. Kenney, M. G. Kanatzidis, *J. Am. Chem. Soc.*, 2012, **134**, 8579–8587.
- [4] M. R. Filip, F. Giustino, *J. Phys. Chem. C*, 2016, **120**, 166–173.
- [5] T. Krishnamoorthy, H. Ding, C. Yan, W. L. Leong, T. Baikie, L. Zhang, M. Sherburne, S. Li, M. Asta, N. Mathews, S. G. Mhaisalkar, *J. Mater. Chem. A*, 2015, **3**, 23829–23832.
- [6] L.-y. Huang, W. R. L. Lambrecht, *Phys. Rev. B*, 2013, **88**, 165203.
- [7] Z. Chen, C. Yu, K. Shum, J. J. Wang, W. Pfenninger, N. Vockic, J. Midgley, and J. T. Kenney, *J. Lumin.*, 2012, **132**, 345.
- [8] X. Mao, L. Sun, T. Wu, T. Chu, W. Deng, K. Han, *J. Phys. Chem. C*, 2018, **122**, 7670–7675.
